# Supplementary material for: Bioluminescence determination of antibacterial activity of Bombyx mori and Galleria mellonella haemolymph
Source: Hindawi journal article supplement (doi:10.1155/2023/5041223), 2013-06-16
Supplement: f1 [file 5041223.f1.pdf]

**Supplement Table 1 : Primers used for real-time PCR.**

| Gene symbol    | Forward primer (5'-3') | Reverse primer (5'-3') |
|----------------|------------------------|------------------------|
| DJ-1           | GTAGCCGTGATGTGGTCATTT  | CTGTGCGCCCAGATTACCT    |
| $\beta$ -actin | ATTGCCGACAGGATGCAGAA   | GCTGATCCACATCTGCTGGAA  |
