# Supplementary material for: Bioluminescence determination of antibacterial activity of Bombyx mori and Galleria mellonella haemolymph
Source: Hindawi journal article supplement (doi:10.1155/2023/5041223), 2013-06-16

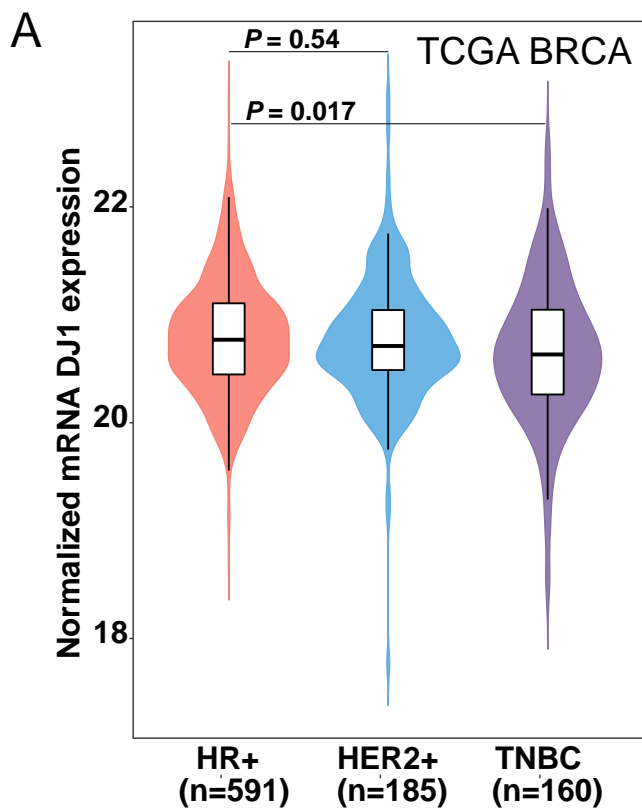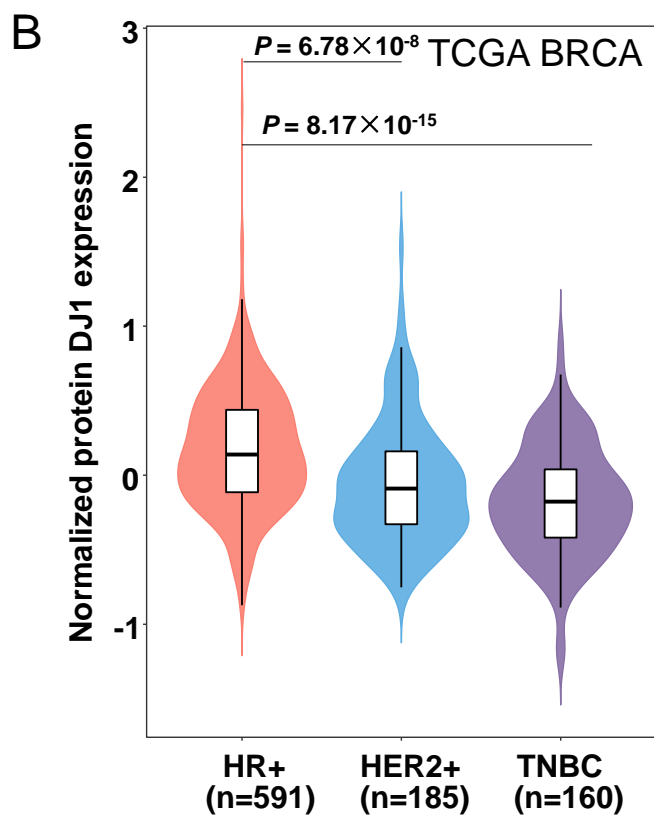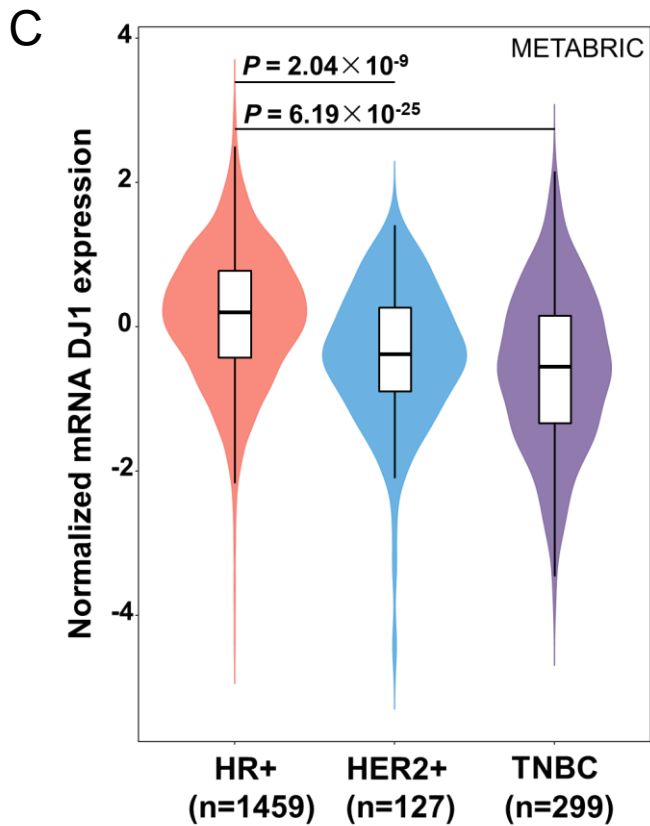

Supplement: f2 [file 5041223.f2.pdf]
