# Supplementary material for: Bioluminescence determination of antibacterial activity of Bombyx mori and Galleria mellonella haemolymph
Source: Hindawi journal article supplement (doi:10.1155/2023/5041223), 2013-06-16
Supplement: f5 [file 5041223.f5.pdf]

TCGA

MetaBric

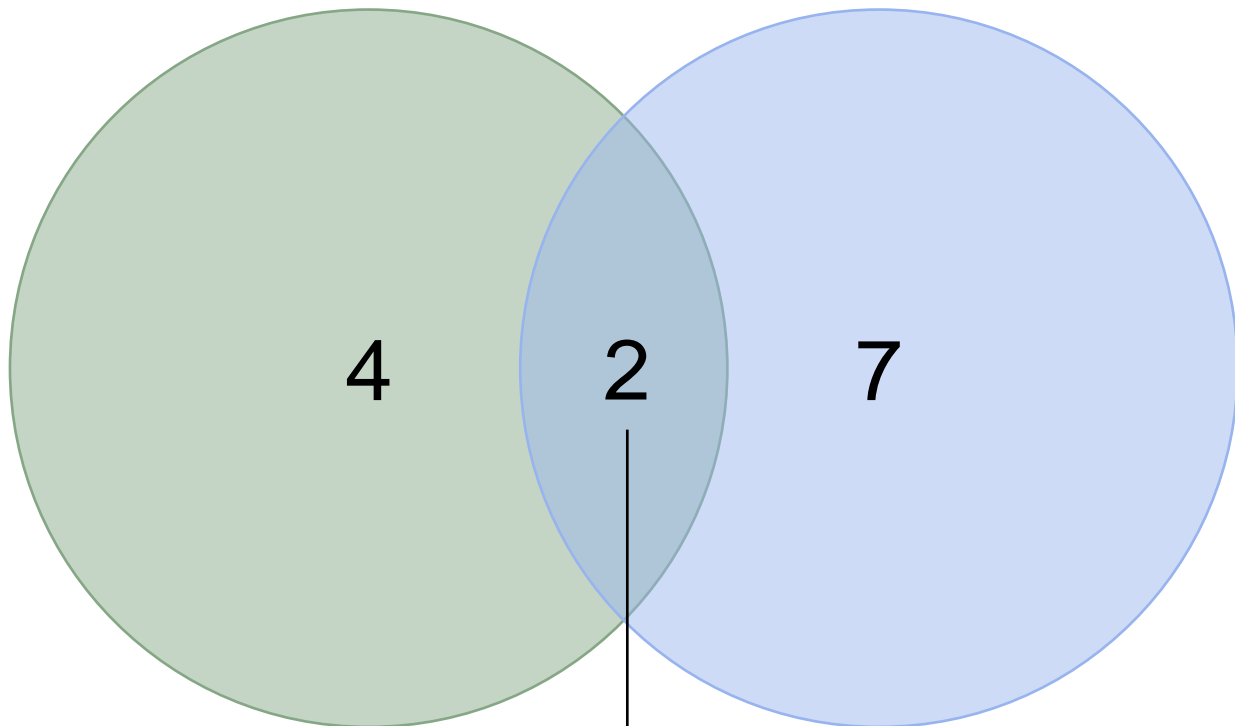

**HALLMARK\_G2M\_CHECKPOINT**

**HALLMARK\_COMPLEMENT**
